# Supplementary material
Source: PubMed Central journal article supplement (PMC4507276)
Supplement: NIHMS703604-supplement-125_2015_3610_MOESM2_ESM.pdf [file NIHMS703604-supplement-125_2015_3610_MOESM2_ESM.pdf]

**SUPPLEMENTAL TABLE 2.** Rates of cardiovascular morbidity and mortality in the genetic subsample of Look AHEAD.

|                            |                    | All participants    |                     | Participants without a history of CVD at baseline |                     |
|----------------------------|--------------------|---------------------|---------------------|---------------------------------------------------|---------------------|
|                            |                    | DSE                 | ILI                 | DSE                                               | ILI                 |
| <b>Primary Outcome</b>     | All participants   | 339 / 16,991 (2.00) | 333 / 17,829 (1.87) | 225 / 15,041 (1.50)                               | 201 / 15,708 (1.28) |
|                            | Non-Hispanic White | 265 / 11,940 (2.22) | 244 / 12,184 (2.00) | 172 / 10,439 (1.65)                               | 137 / 10,643 (1.29) |
|                            | African-Americans  | 39 / 2,766 (1.41)   | 57 / 2,876 (1.98)   | 28 / 2,539 (1.10)                                 | 44 / 2,580 (1.71)   |
|                            | Hispanic / NA      | 35 / 2,285 (1.53)   | 32 / 2,769 (1.16)   | 25 / 2,063 (1.21)                                 | 20 / 2,485 (0.80)   |
| <b>Secondary Outcome 1</b> | All participants   | 229 / 17,612 (1.30) | 218 / 18,422 (1.18) | 150 / 15,438 (0.97)                               | 127 / 16,059 (0.79) |
|                            | Non-Hispanic White | 176 / 12,455 (1.41) | 154 / 12,621 (1.22) | 111 / 10,766 (1.03)                               | 83 / 10,864 (0.76)  |
|                            | African-Americans  | 28 / 2,823 (0.99)   | 42 / 2,968 (1.41)   | 21 / 2,579 (0.81)                                 | 31 / 2,663 (1.16)   |
|                            | Hispanic / NA      | 25 / 2,334 (1.07)   | 22 / 2,832 (0.78)   | 18 / 2,092 (0.86)                                 | 13 / 2,532 (0.51)   |
| <b>Secondary Outcome 2</b> | All participants   | 420 / 16,992 (2.47) | 405 / 17,830 (2.27) | 291 / 15,042 (1.93)                               | 257 / 15,708 (1.64) |
|                            | Non-Hispanic White | 326 / 11,941 (2.73) | 299 / 12,185 (2.45) | 222 / 10,440 (2.13)                               | 181 / 10,643 (1.70) |
|                            | African-Americans  | 50 / 2,766 (1.81)   | 65 / 2,876 (2.26)   | 36 / 2,539 (1.42)                                 | 51 / 2,580 (1.98)   |
|                            | Hispanic / NA      | 44 / 2,285 (1.93)   | 41 / 2,769 (1.48)   | 33 / 2,063 (1.60)                                 | 25 / 2,485 (1.01)   |
| <b>Secondary Outcome 3</b> | All participants   | 479 / 16,598 (2.89) | 476 / 17,440 (2.73) | 327 / 14,838 (2.20)                               | 309 / 15,439 (2.00) |
|                            | Non-Hispanic White | 364 / 11,672 (3.12) | 353 / 11,874 (2.97) | 240 / 10,331 (2.32)                               | 222 / 10,419 (2.13) |
|                            | African-Americans  | 62 / 2,698 (2.30)   | 75 / 2,842 (2.64)   | 48 / 2,477 (1.94)                                 | 58 / 2,558 (2.27)   |
|                            | Hispanic / NA      | 53 / 2,228 (2.38)   | 48 / 2,724 (1.76)   | 39 / 2,030 (1.92)                                 | 29 / 2,462 (1.18)   |

Numbers denote total number of events, total person-years of follow-up, and rate of event per 100 person years. NA denotes Native-American.

Primary composite outcome includes death from cardiovascular causes, nonfatal myocardial infarction, nonfatal stroke, or hospitalization for angina. Secondary Outcome 1 includes death from cardiovascular causes, nonfatal myocardial infarction, or nonfatal stroke. Secondary Outcome 2 includes death from any cause, nonfatal myocardial infarction, or nonfatal stroke. Secondary Outcome 3 includes death from any cause, nonfatal myocardial infarction, nonfatal stroke, hospitalization for angina, CABG, PCI, hospitalization for heart failure, carotid endarterectomy, or peripheral vascular disease.
