# Supplementary material
Source: PubMed Central journal article supplement (PMC4507276)
Supplement: NIHMS703604-supplement-125_2015_3610_MOESM4_ESM.pdf [file NIHMS703604-supplement-125_2015_3610_MOESM4_ESM.pdf]

## **Committees at End of Intervention for Category A Papers**

Updated 04/11/2013

### **Committees**

Adjudication and Events Cora E. Lewis, MD, MSPH (chair); Lawrence Cheskin, MD; Richard S. Crow, MD; Lawrence M. Friedman, MD; Stephen Glasser, MD; Patricia Hogan, MS; Karen C. Johnson, MD, MPH; David Lefkowitz, MD; Ron Prineas, MD; J. Bruce Redmon, MD; Patrick S. Reynolds, MD; Monika Safford, MD; Tandaw Samdarshi, MD; Carrie C. Williams, MA, CCRP

Ancillary Studies John M. Jakicic, PhD (chair); James O. Hill, PhD (former chair); Ashok Balasubramanyam, MD; George Blackburn, MD, PhD; Lawton S. Cooper, MD, MPH; Kathy M. Dotson, BA; Mary Evans, PhD; Gary Foster, PhD; Jeanne McCaffery, PhD; David Reboussin, PhD

Clinic Operations and Quality Control George A. Bray, MD (co-chair); Sheikilya Thomas, MPH (co-chair); Richard S. Crow, MD; Mary Evans, PhD; Edward W. Gregg, PhD; James O. Hill, PhD; Amelia Hodges, BS, CCRP; Robert W. Jeffery, PhD; Tina Killean, BS; Maria G. Montez, RN, MSHP, CDE; David Reboussin, PhD; Lee Swartz

Committee Overseeing Protocol Richard Rubin, PhD (chair); Frederick L. Brancati, MD, MHS (former chair); Judy L. Bahnson, BA, CCRP; Kathy M. Dotson, BA; Mark A. Espeland, PhD; Mary Evans, PhD; Cora E. Lewis, MD, MSPH; Barbara J. Maschak-Carey, MSN, CDE ; David M. Nathan, MD; Delia S. West, PhD; Rena R. Wing, PhD

Diabetes Support and Education Jacqueline Wesche-Thobaben, RN, BSN, CDE (co-chair); Anne Peters, MD (co-chair); Jeanne M. Clark, MD, MPH (former co-chair); Abbas E. Kitabchi,

PhD, MD (former co-chair); Judy L. Bahnson, BA, CCRP; Caitlin Egan, MS; Mary Evans, PhD; Valerie Goldman, MS, RD; Amelia Hodges, BS, CCRP; Dominique Limprevil-Divers, MA, MEd; Juliet Mancino, MS, RD, CDE, LDN; Cathy Manus, LPN; Tricia Skarphol, MA; J. Lee Taylor, MEd, MBA

Economic Evaluation Henry Glick, PhD (co-chair); William C. Knowler, MD, DrPH (co-chair); Alain G. Bertoni, MD, MPH; Brenda L. Craven, MS, CCRP; Kathy M. Dotson, BA; Mark A. Espeland, PhD; Mary Evans, PhD; Richard Hamman, MD; Don G. Hire, BS; Tina Killean, BS; Michael S. Lawlor, PhD; Dominique Limprevil-Divers, MA, MEd; Maria G. Montez, RN, MSHP, CDE; Julia T. Rushing, MS; Adam G. Tsai, MD; David F. Williamson, PhD; Ping Zhang, PhD

Executive Judy L. Bahnson, BA, CCRP; Mark A. Espeland, PhD; Mary Evans, PhD; Barbara Harrison, MS; Xavier Pi-Sunyer, MD; Lynne E. Wagenknecht, DrPH; Rena R. Wing, PhD

Program Coordinators Barbara J Maschak-Carey, MSN, CDE (co-chair); Marsha Miller, MS RD (co-chair); Brenda Montgomery, RN, MS, CDE (former chair); Judy L. Bahnson, BA, CCRP; Paula Bolin, RN, MC; Kathy M. Dotson, BA; Caitlin Egan, MS; Mary Evans, PhD; Molly Gee, MEd, RD; Siran Ghazarian, MD; Valerie Goldman, MS, RD; Carolyn Gresham, RN; Barbara Harrison, MS; Diane Hirsch, RNC, MS, CDE; Amelia Hodges, BS, CCRP; Sharon D. Jackson, MS, RD, CDE; Tina Killean, BS; Helen Lambeth, RN, BSN; Dominique Limprevil-Divers, MA, MEd; Maria G. Montez, RN, MSHP, CDE; Moana Mosby, RN; Anne Murillo, BS; Jennifer Patricio, MS; Rebecca Reeves, DrPh, RD, FADA; Tricia Skarphol, MA; Allison Strate, RN; Lee Swartz; Sheikilya Thomas, MPH; Carolyn Thorson, CCRP; Jacqueline Wesche-Thobaben, RN, BSN, CDE; Carrie C. Williams, MA, CCRP; Rena R. Wing, PhD

Publications and Presentations Jeanne M. Clark, MD, MPH (chair); Donna H. Ryan, MD (former chair); Mark A. Espeland, PhD; Edward W. Gregg, PhD; Amelia Hodges, BS, CCRP; Van S. Hubbard, MD, PhD; Karen C. Johnson, MD, MPH; Steven E. Kahn, MB, ChB; Abbas E. Kitabchi, PhD, MD; William C. Knowler, MD, DrPH; Dominique Limprevil-Divers, MA, MEd; David M. Nathan, MD; Xavier Pi-Sunyer, MD; Monika Safford, MD; Lynne E. Wagenknecht, DrPH; Carrie C. Williams, MA, CCRP; Rena R. Wing, PhD; Susan Z. Yanovski, MD

Retention Jennifer Patricio, MS (chair); Lynne Lichtermann, RN, BSN (former chair); Jennifer Arceneaux, RN; Jeanne Charleston, RN; Kathy M. Dotson, BA; Caitlin Egan, MS; Mary Evans, PhD; Richard Foushee, PhD; Molly Gee, MEd, RD; Carolyn Gresham, RN; Nancy J. Hall, MA; Ruby Johnson; Robert Knopp, MD; Helen Lambeth, RN, BSN; Rebecca Reeves, DrPh, RD, FADA; Richard Rubin, PhD; Allison Strate, RN; Brent Van Dorsten, PhD

Safety Frederick L. Brancati, MD, MHS (chair); David Kelly, MD (former chair); Judy L. Bahnson, BA, CCRP; Alain G. Bertoni, MD, MPH; Lawton S. Cooper, MD, MPH; Jeffrey M. Curtis, MD, MPH; Sarah A. Gaussoin, MS; Siran Ghazarian, MD; Van S. Hubbard, MD, PhD; Steven E. Kahn, MB, ChB; Barbara J. Maschak-Carey, MSN, CDE; Anne Murillo, BS; Anne Peters, MD; Xavier Pi-Sunyer, MD; Susan Z. Yanovski, MD

Steering Rena R. Wing, PhD (chair); Xavier Pi-Sunyer, MD (co-chair); Frederick L. Brancati, MD, MHS; George A. Bray, MD<sup>1</sup>; Jeanne M. Clark, MD, MPH; Jeffrey M. Curtis, MD, MPH; Mark A. Espeland, PhD; Mary Evans, PhD; John P. Foreyt, PhD; Steven Haffner, MD; Barabara Harrison, MS; Helen P. Hazuda, PhD; James O. Hill, PhD<sup>1</sup>; Edward S. Horton, MD; John M. Jakicic, PhD; Robert W. Jeffery, PhD; Karen C. Johnson, MD, MPH; Steven E. Kahn, MB, ChB; David Kelly, MD; Abbas E. Kitabchi, PhD, MD; William C. Knowler, MD, DrPH; Cora E. Lewis,

MD, MSPH; David M. Nathan, MD; Anne Peters, MD; Thomas A. Wadden, PhD ; Lynne E. Wagenknecht, DrPH

Weight Loss Intervention Thomas A. Wadden, PhD (chair); Delia S. West, PhD (co-chair); John P. Bantle, MD; Robert I. Berkowitz, MD; Paula Bolin, RN, MC; Barbara Cerniauskas, LDN, RD, CDE; Linda Delahanty, MS, RD; Kathy M. Dotson, BA; Mary Evans, PhD; John P. Foreyt, PhD; Edward W. Gregg, PhD; Helen P. Hazuda, PhD; John M. Jakicic, PhD; Shiriki Kumanyika, PhD, RD, MPH; Marsha Miller, MS RD; Carmen Pal, MD; Rebecca Reeves, DrPh, RD, FADA; W. Jack Rejeski, PhD; Amy D. Rickman, PhD, RD, LDN; Mara Vitolins, DrPH; Don Williamson, PhD; Rena R. Wing, PhD; Susan Z. Yanovski, MD
